# Supplementary material
Source: PubMed Central journal article supplement (PMC5120158)

Figure.S1

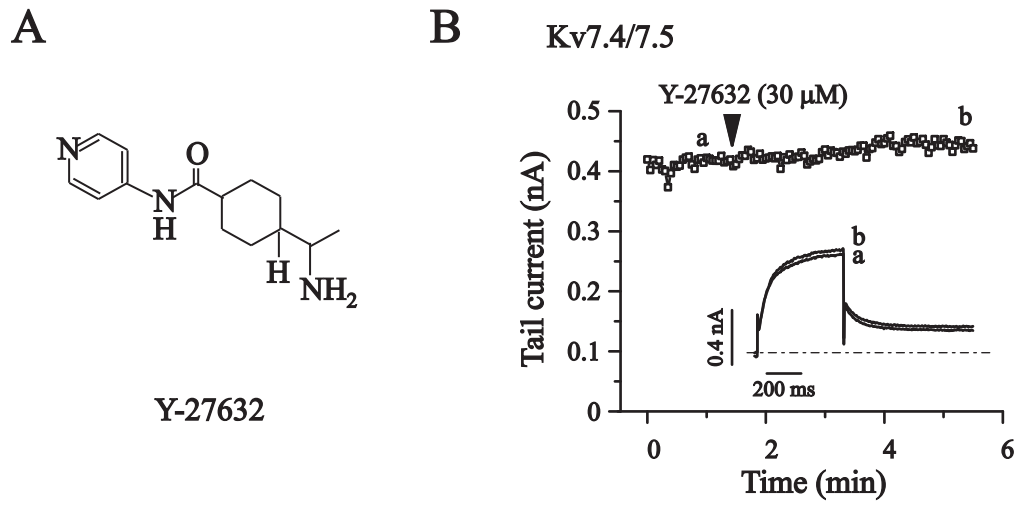

Figure.S2

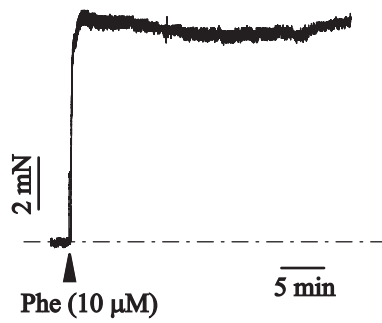

Figure.S3

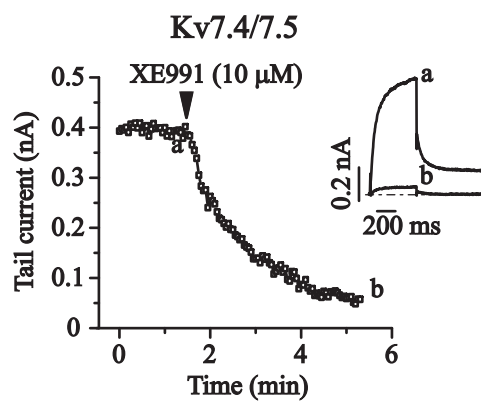

Supplement: BPH-173-3480-s001.pdf [file BPH-173-3480-s001.pdf]
